# Supplementary material for: Small pore SAPO-14-based zeolites with improved propylene selectivity in the methanol to olefins process
Source: Royal Society of Chemistry journal article supplement (doi:10.1039/d2qi00155a), 2022-01-01
Supplement: d2qi00155a1.pdf [file d2qi00155a1.pdf]

## Supporting information

For

### **Small pore SAPO-14-based zeolites with improved propylene selectivity in methanol to olefins**

Yida Zhou, Jiani Zhang, Wenyan Ma, Xin Yin, Guangrui Chen, Yinghao Liu, Jiyang Li\*

State Key Laboratory of Inorganic Synthesis and Preparative Chemistry, College of Chemistry, Jilin University, 2699 Qianjin Street, Changchun 130012, P. R. China

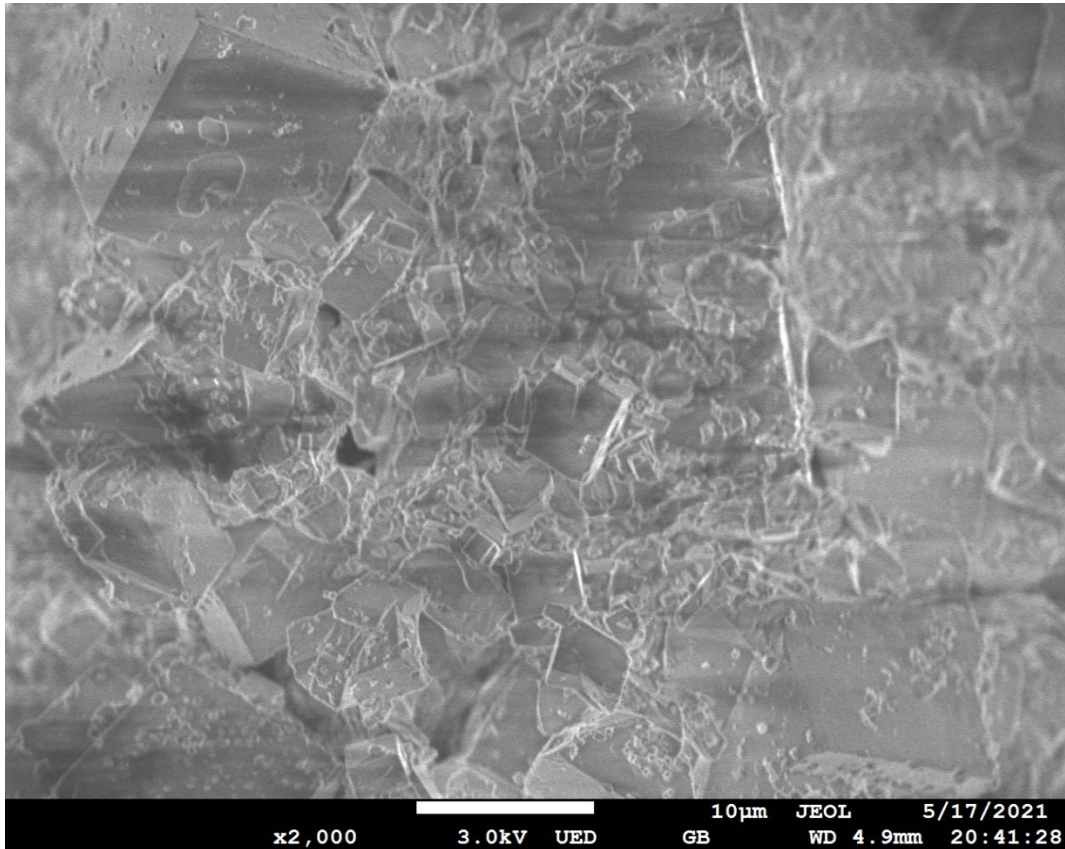

Fig. S1 SEM image of S-M sample (the mixture of S-14 and S-34)

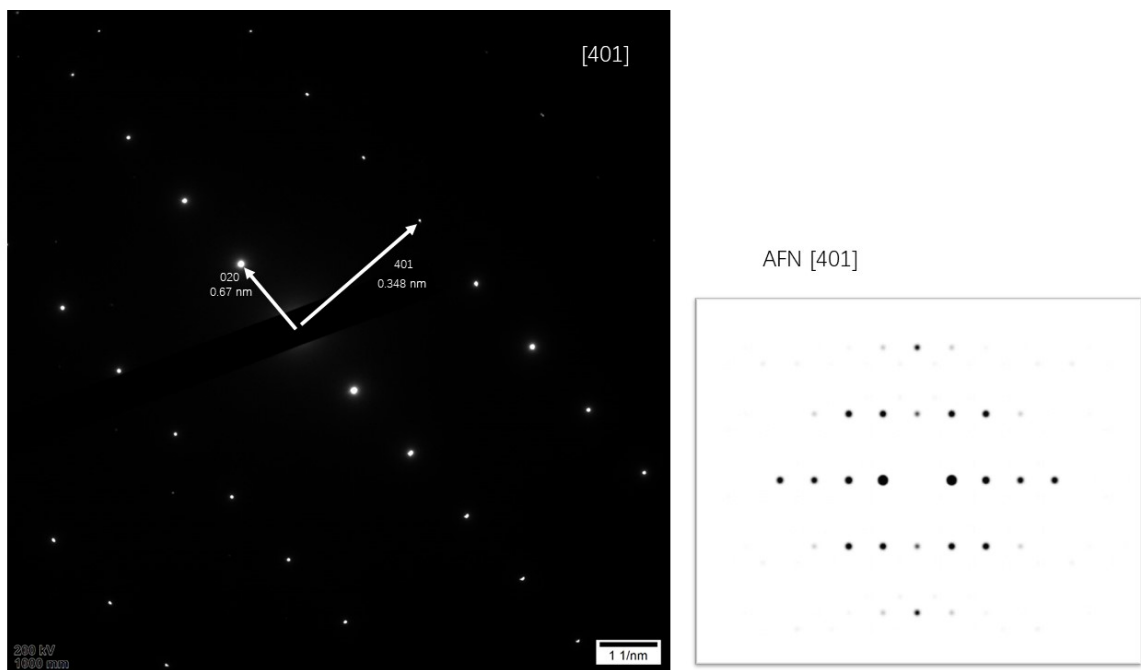

Fig. S2 The electron diffraction of S-14

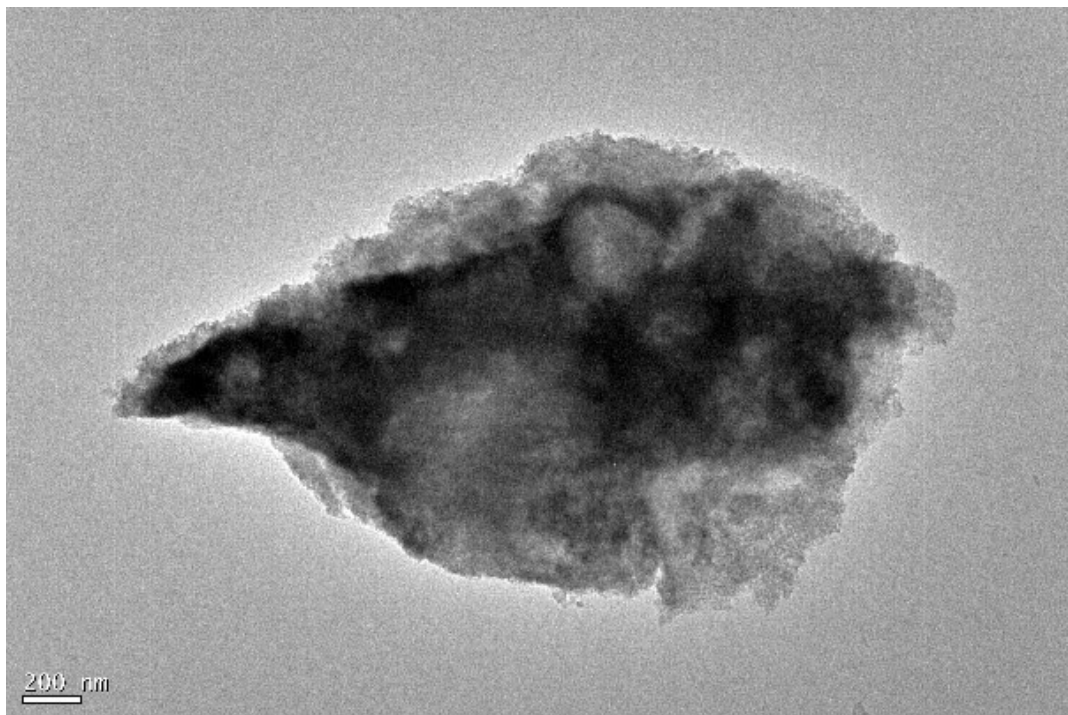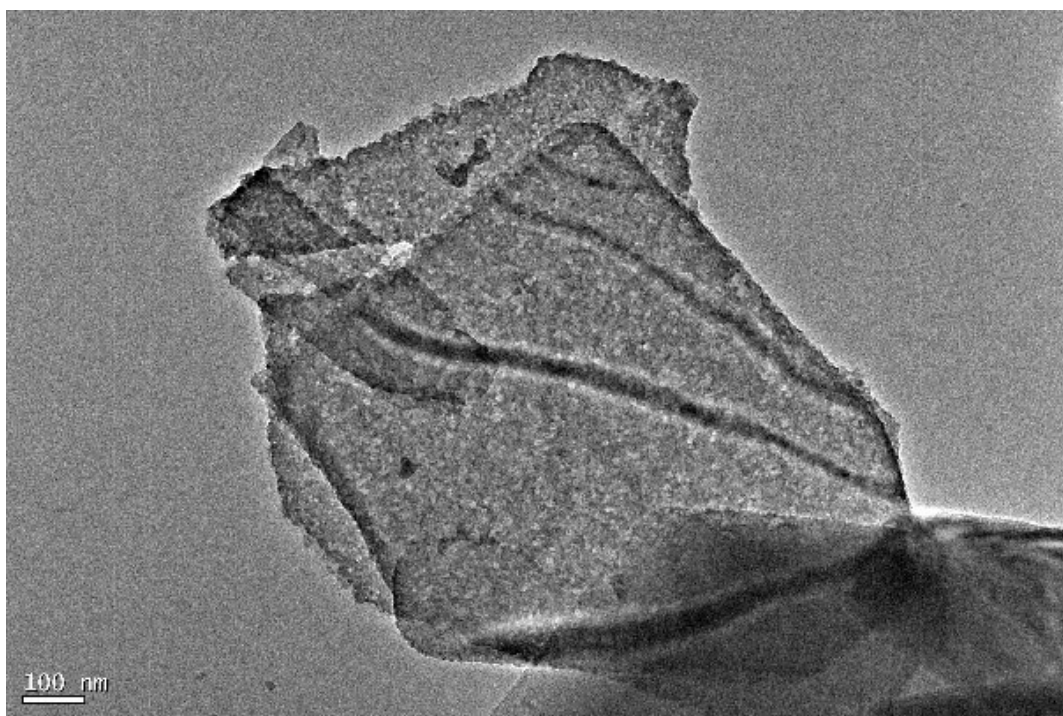

Fig. S3 Hierarchical porous structure observed in TEM images of SAPO-34/SAPO-14 particles in S-2 sample

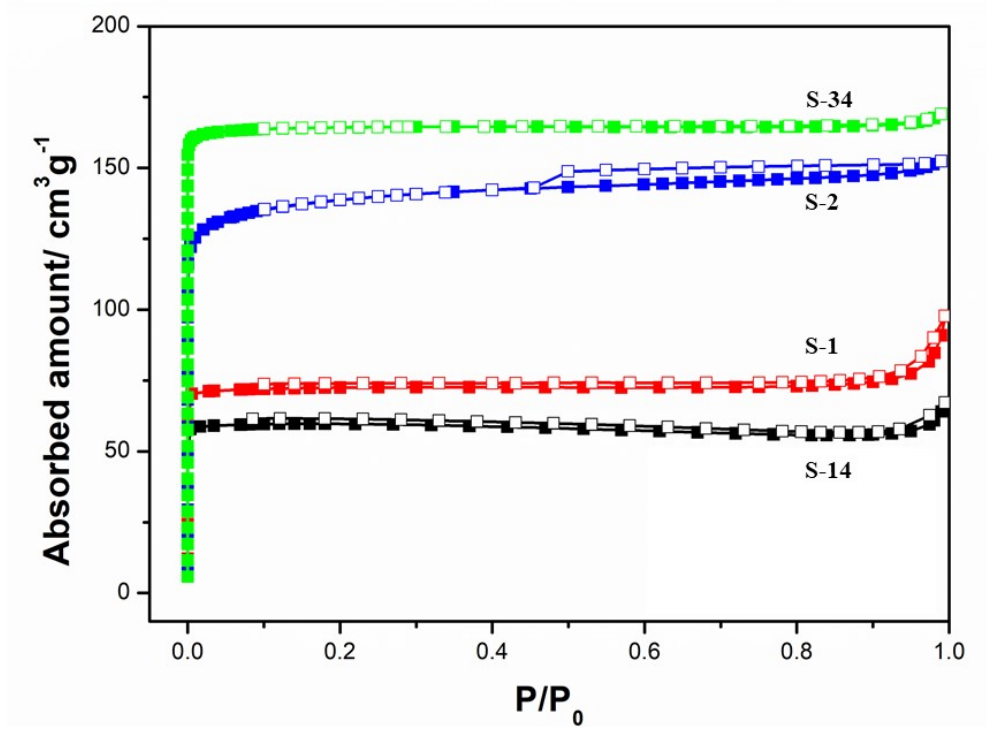

Fig. S4  $\text{N}_2$  adsorption-desorption curves of S-34, S-14, S-1 and S-2 samples.

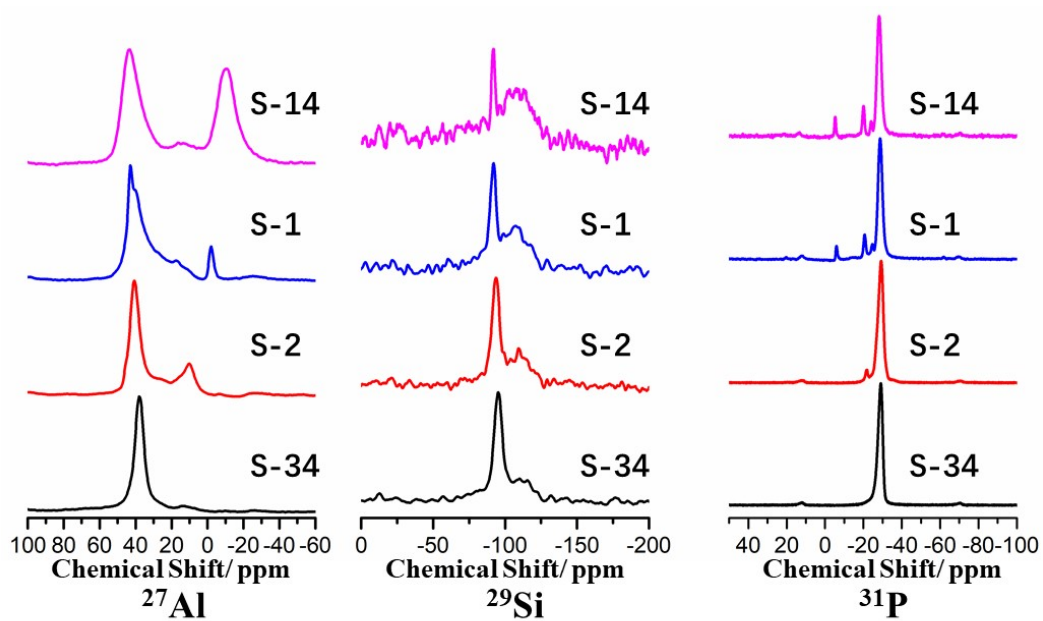

Fig. S5  $^{27}\text{Al}$ ,  $^{29}\text{Si}$  and  $^{31}\text{P}$  solid state MAS NMR of S-34, S-14, S-1 and S-2 samples.

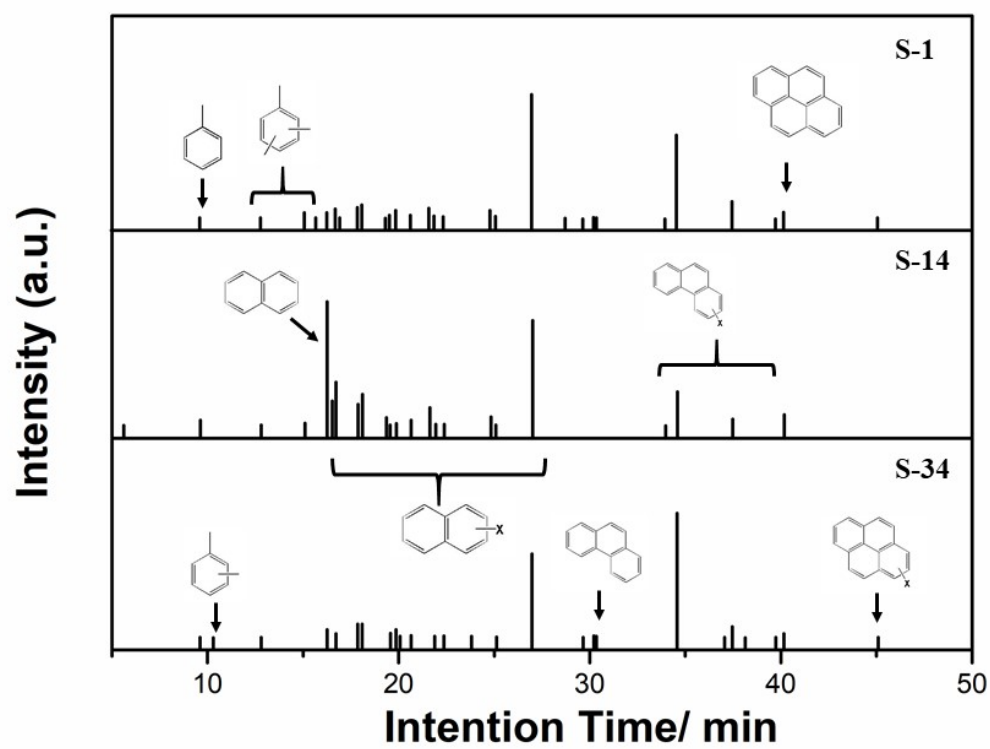

Fig. S6 Coke analyst by GC-MS of S-34, S-14 and S-1 samples.

Table S1 SAPO-14 zeolites with different Si/Al ratios obtained from the gel consists of 1.0 Al<sub>2</sub>O<sub>3</sub>:1.0 P<sub>2</sub>O<sub>5</sub>: x SiO<sub>2</sub>: 3.0 i-PA: 50.0 H<sub>2</sub>O

| Sample name | X   | Si/Al ratio <sup>a</sup> | Topological           |
|-------------|-----|--------------------------|-----------------------|
| 1           | 0   | 0                        | AFN                   |
| 2           | 0.1 | 0.054                    | AFN                   |
| 3           | 0.2 | 0.101                    | AFN                   |
| 4           | 0.3 | 0.148                    | AFN                   |
| 5           | 0.4 | 0.228                    | AFN                   |
| 6           | 0.5 | 0.241                    | AFN (slight impurity) |
| 7           | 0.6 | 0.243                    | AFN-CHA               |
| 8           | 0.7 | 0.292                    | AFN-CHA-AFI           |

<sup>a</sup> calculated from ICP.



Table S2 Textural properties of as-synthesized samples.

| Sample names | $S_{\text{BET}}(\text{m}^2/\text{g})^{\text{a}}$ | $S_{\text{micro}}(\text{m}^2/\text{g})^{\text{b}}$ | $S_{\text{ext}}(\text{m}^2/\text{g})^{\text{b}}$ | $V_{\text{micro}}(\text{cm}^3/\text{g})^{\text{b}}$ |
|--------------|--------------------------------------------------|----------------------------------------------------|--------------------------------------------------|-----------------------------------------------------|
| S-34         | 694.1                                            | 682.5                                              | 11.55                                            | 0.26                                                |
| S-14         | 195.0                                            | 194.9                                              | 0.1                                              | 0.09                                                |
| S-1          | 242.1                                            | 233.1                                              | 8.9                                              | 0.11                                                |
| S-2          | 408.7                                            | 336.2                                              | 72.5                                             | 0.18                                                |

a.  $S_{\text{BET}}$  (total surface area) is calculated by BET formula, the data from  $0.05 < P/P_0 < 0.30$ . b.  $S_{\text{micro}}$  (micropore surface area),  $S_{\text{ext}}$  (external surface area) and  $V_{\text{micro}}$  (micropore volume) are calculated by t-plot method.

Table S3 The selectivity of sample S-1.

| Sample names | TOS (min) | Selectivity(%)  |                               |                               |                               |                               |                               |                                |
|--------------|-----------|-----------------|-------------------------------|-------------------------------|-------------------------------|-------------------------------|-------------------------------|--------------------------------|
|              |           | CH <sub>4</sub> | C <sub>2</sub> H <sub>4</sub> | C <sub>2</sub> H <sub>6</sub> | C <sub>3</sub> H <sub>6</sub> | C <sub>3</sub> H <sub>8</sub> | C <sub>4</sub> H <sub>8</sub> | C <sub>4</sub> H <sub>10</sub> |
| S-1          | 126       | 3.6             | 18.2                          | 0.87                          | 48.4                          | 3.8                           | 14.7                          | 5.0                            |
